# Supplementary material for: Fast and simple analysis of the content of Zn, Mg, Ca, Na, and K in selected beverages widely consumed by athletes by flowing liquid cathode atmospheric pressure glow discharge optical emission spectrometry
Source: Royal Society of Chemistry journal article supplement (doi:10.1039/d3ay00092c), 2023-01-01
Supplement: d3ay00092c1.pdf [file d3ay00092c1.pdf]

*Supporting Information*

**Fast and simple analysis of selected beverages widely consumed by athletes on the content of Zn, Mg, Ca, Na, and K by flowing liquid cathode atmospheric pressure glow discharge optical emission spectrometry**

Monika Gorska\*, Joanna Weiss, Pawel Pohl

*Wroclaw University of Science and Technology, Faculty of Chemistry, Division of Analytical Chemistry and Chemical Metallurgy, Wybrzeze Stanislawa Wyspianskiego 27, 50-370 Wroclaw, Poland*

\* Corresponding author. E-mail address: monika.gorska@pwr.edu.pl (Monika Gorska)

Table S11. Agilent 5110 SVDV ICP-OES operating parameters.

|                                                |                                               |
|------------------------------------------------|-----------------------------------------------|
| RF power (kW)                                  | 1.50                                          |
| Plasma Ar flow rate (L min <sup>-1</sup> )     | 12.0                                          |
| Nebulizing Ar flow rate (L min <sup>-1</sup> ) | 0.7                                           |
| Auxiliary Ar flow rate (L min <sup>-1</sup> )  | 1.0                                           |
| Uptake delay time (s)                          | 10                                            |
| Read time (s)                                  | 5                                             |
| Number of replicates                           | 3                                             |
| Stabilization time (s)                         | 15                                            |
| Viewing mode                                   | SVDS                                          |
| Viewing height (mm)                            | 8                                             |
| Pump speed (rpm)                               | 12                                            |
| Background correction                          | Off-peak, fitted, 2 pixels                    |
| Analytical line (nm)                           | 280.3 (Mg), 422.7 (Ca), 589.6 (Na), 766.5 (K) |

Table SI2. Analytical performance of the investigated FLC-APGD system combined with the OES detection.

| <b>Element</b> | <b>DL (<math>\mu\text{g L}^{-1}</math>)</b> | <b>ULR (<math>\text{mg L}^{-1}</math>)</b> | <b>a (a.u. per <math>\mu\text{g L}^{-1}</math>)</b> |
|----------------|---------------------------------------------|--------------------------------------------|-----------------------------------------------------|
| <b>Zn</b>      | 21                                          | 2.00                                       | $1.33 \cdot 10^1$                                   |
| <b>Mg</b>      | 0.91                                        | 1.00                                       | $6.13 \cdot 10^2$                                   |
| <b>Ca</b>      | 20                                          | 2.00                                       | $1.57 \cdot 10^1$                                   |
| <b>Na</b>      | 0.062                                       | 0.50                                       | $5.70 \cdot 10^3$                                   |
| <b>K</b>       | 0.14                                        | 0.50                                       | $1.74 \cdot 10^3$                                   |

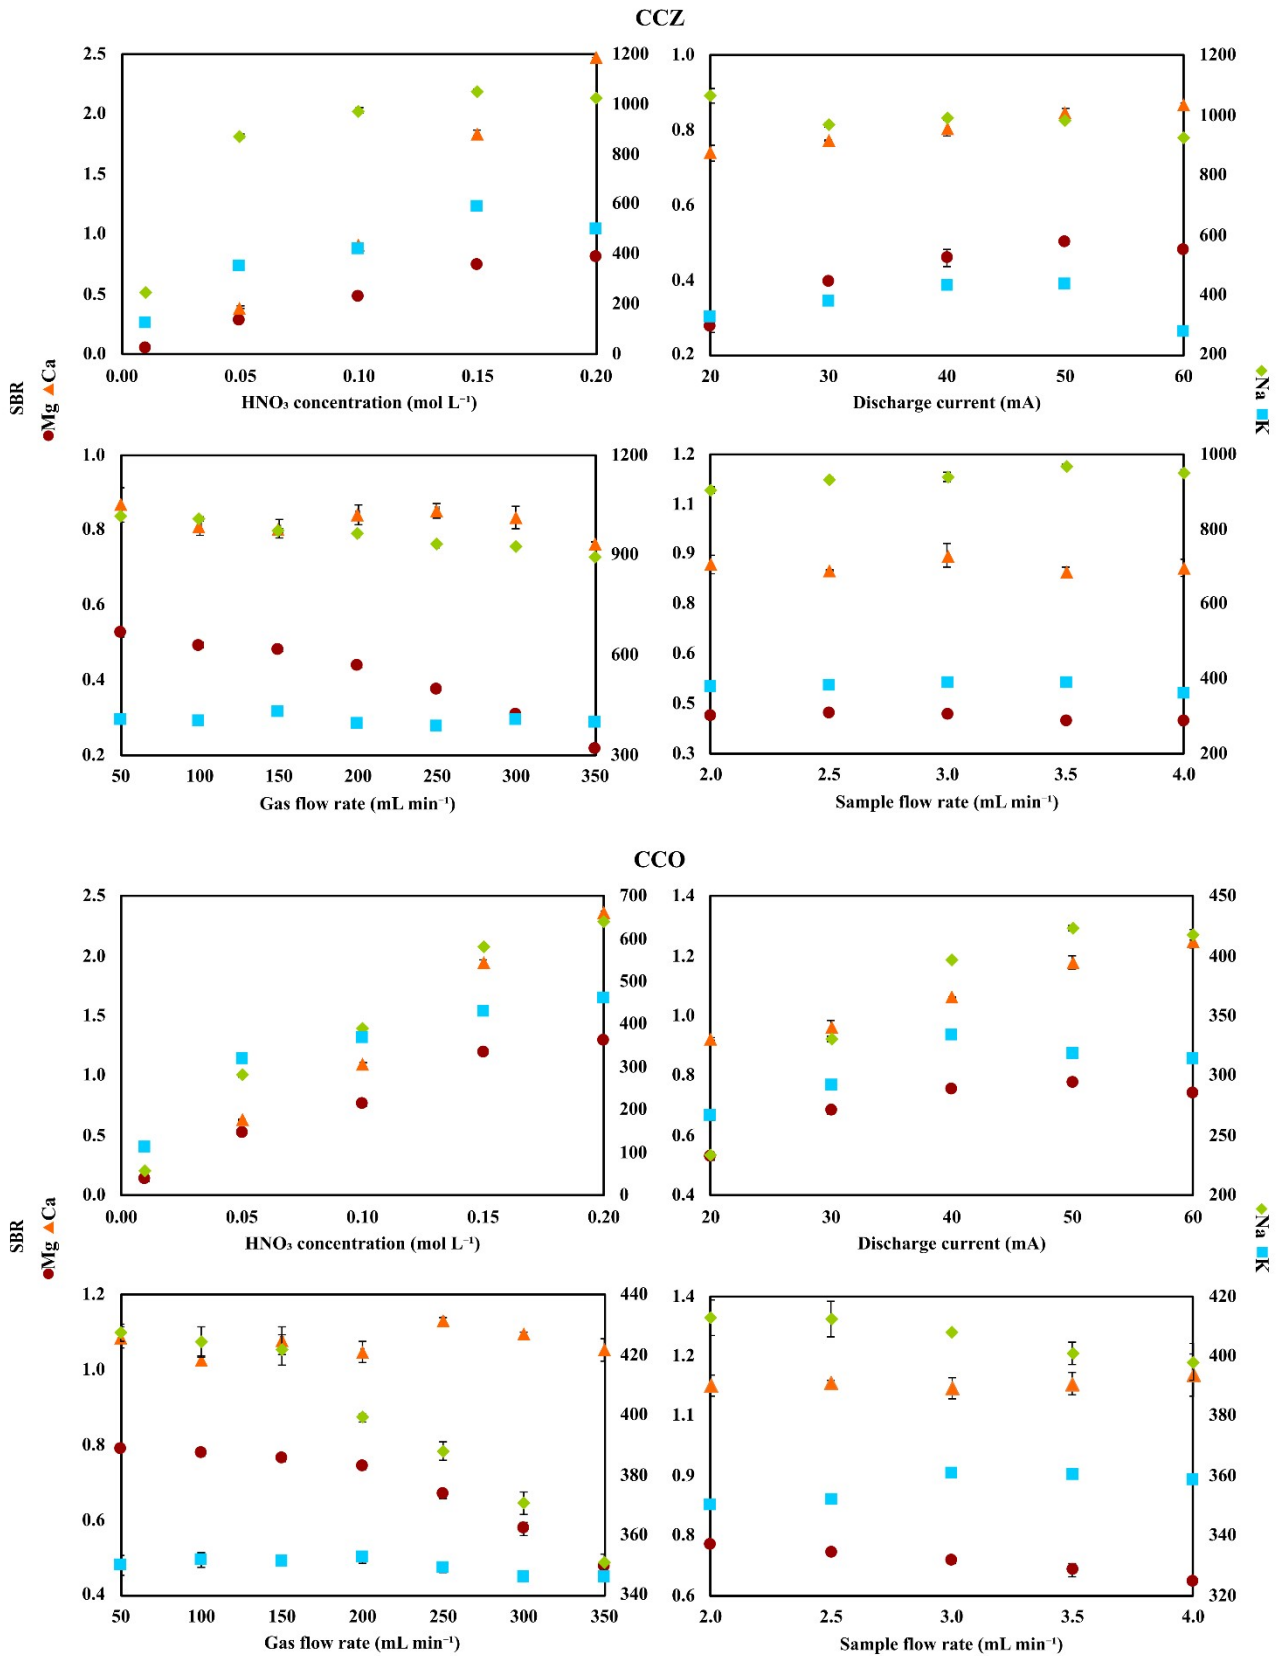

Fig. S11. The impact of the HNO<sub>3</sub> concentration, the discharge current, the gas flow rate, and the sample flow rate on the SBR values of the analytical lines of the studied elements for the CCZ and CCO samples.

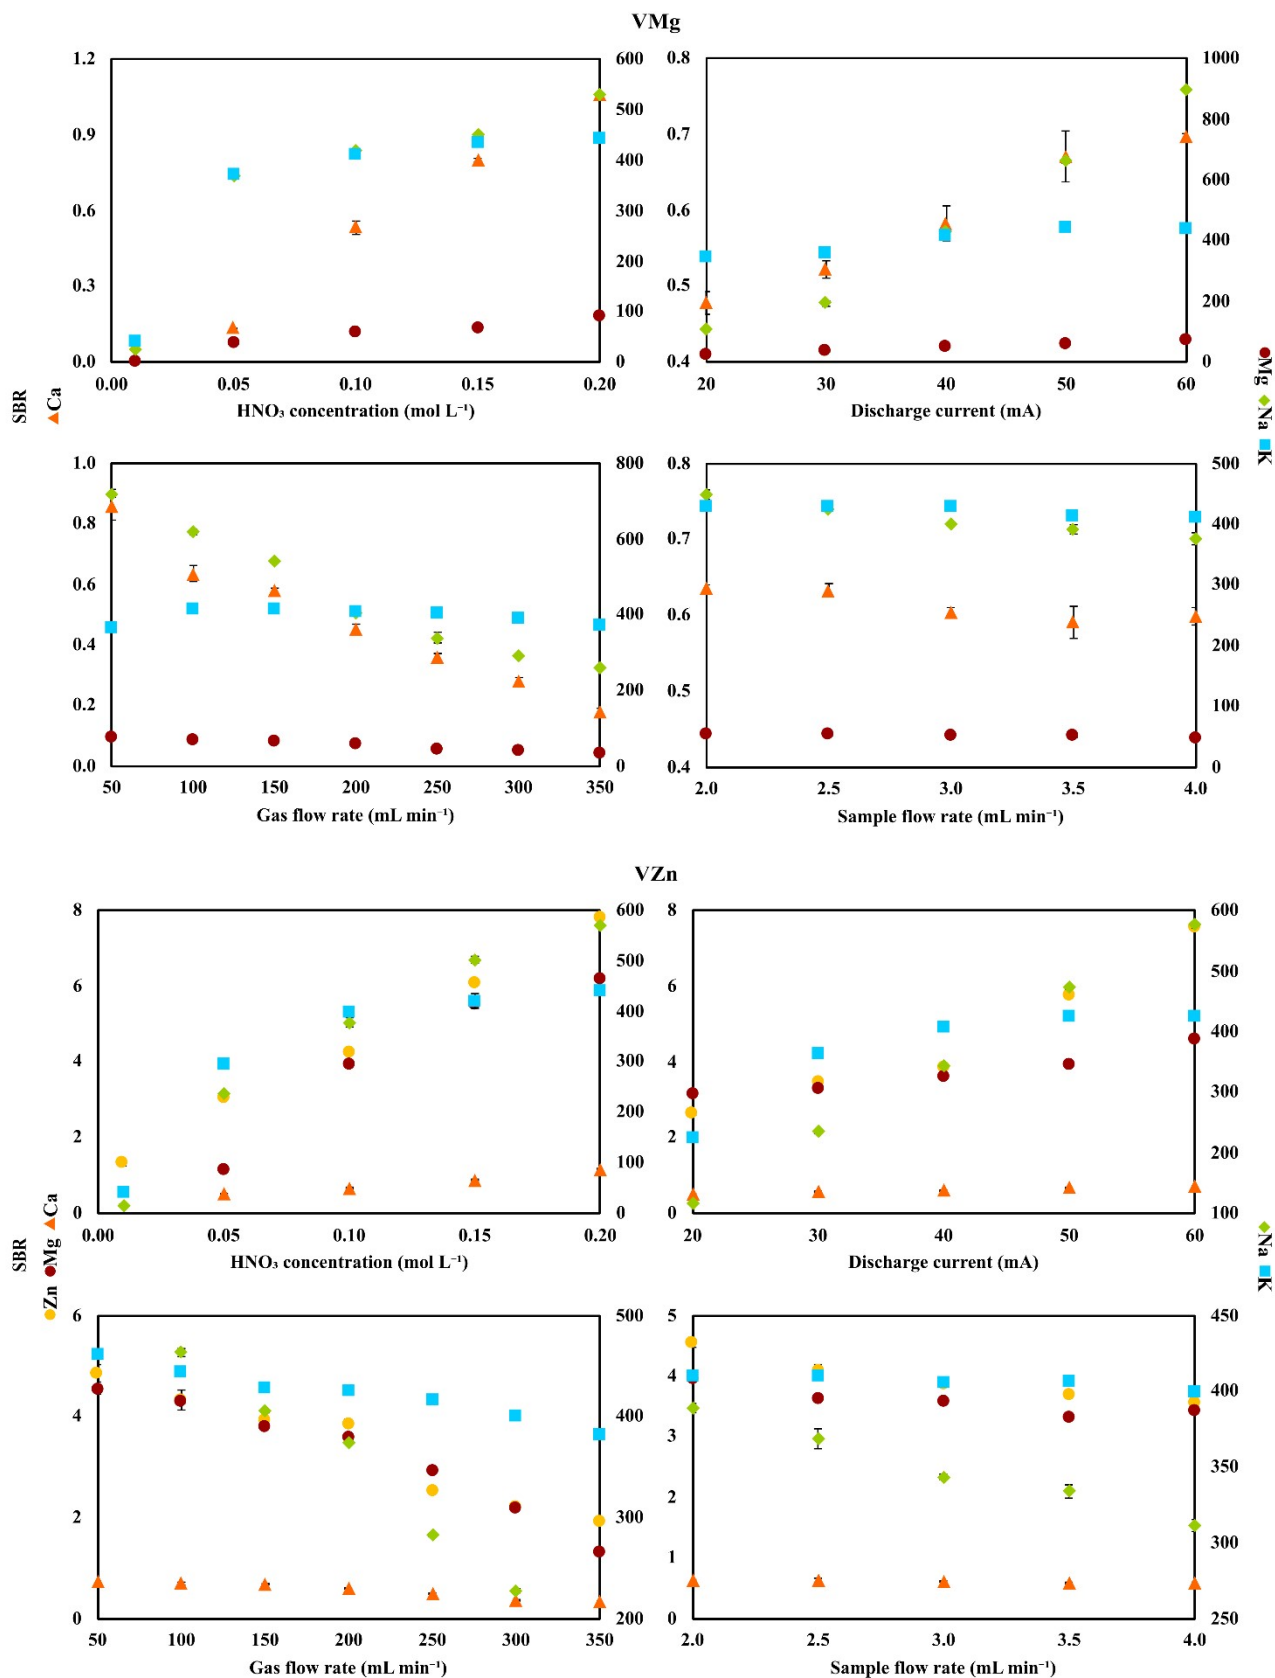

Fig. S12. The impact of the HNO<sub>3</sub> concentration, the discharge current, the gas flow rate, and the sample flow rate on the SBR values of the analytical lines of the studied elements for the VMg and VZn samples.

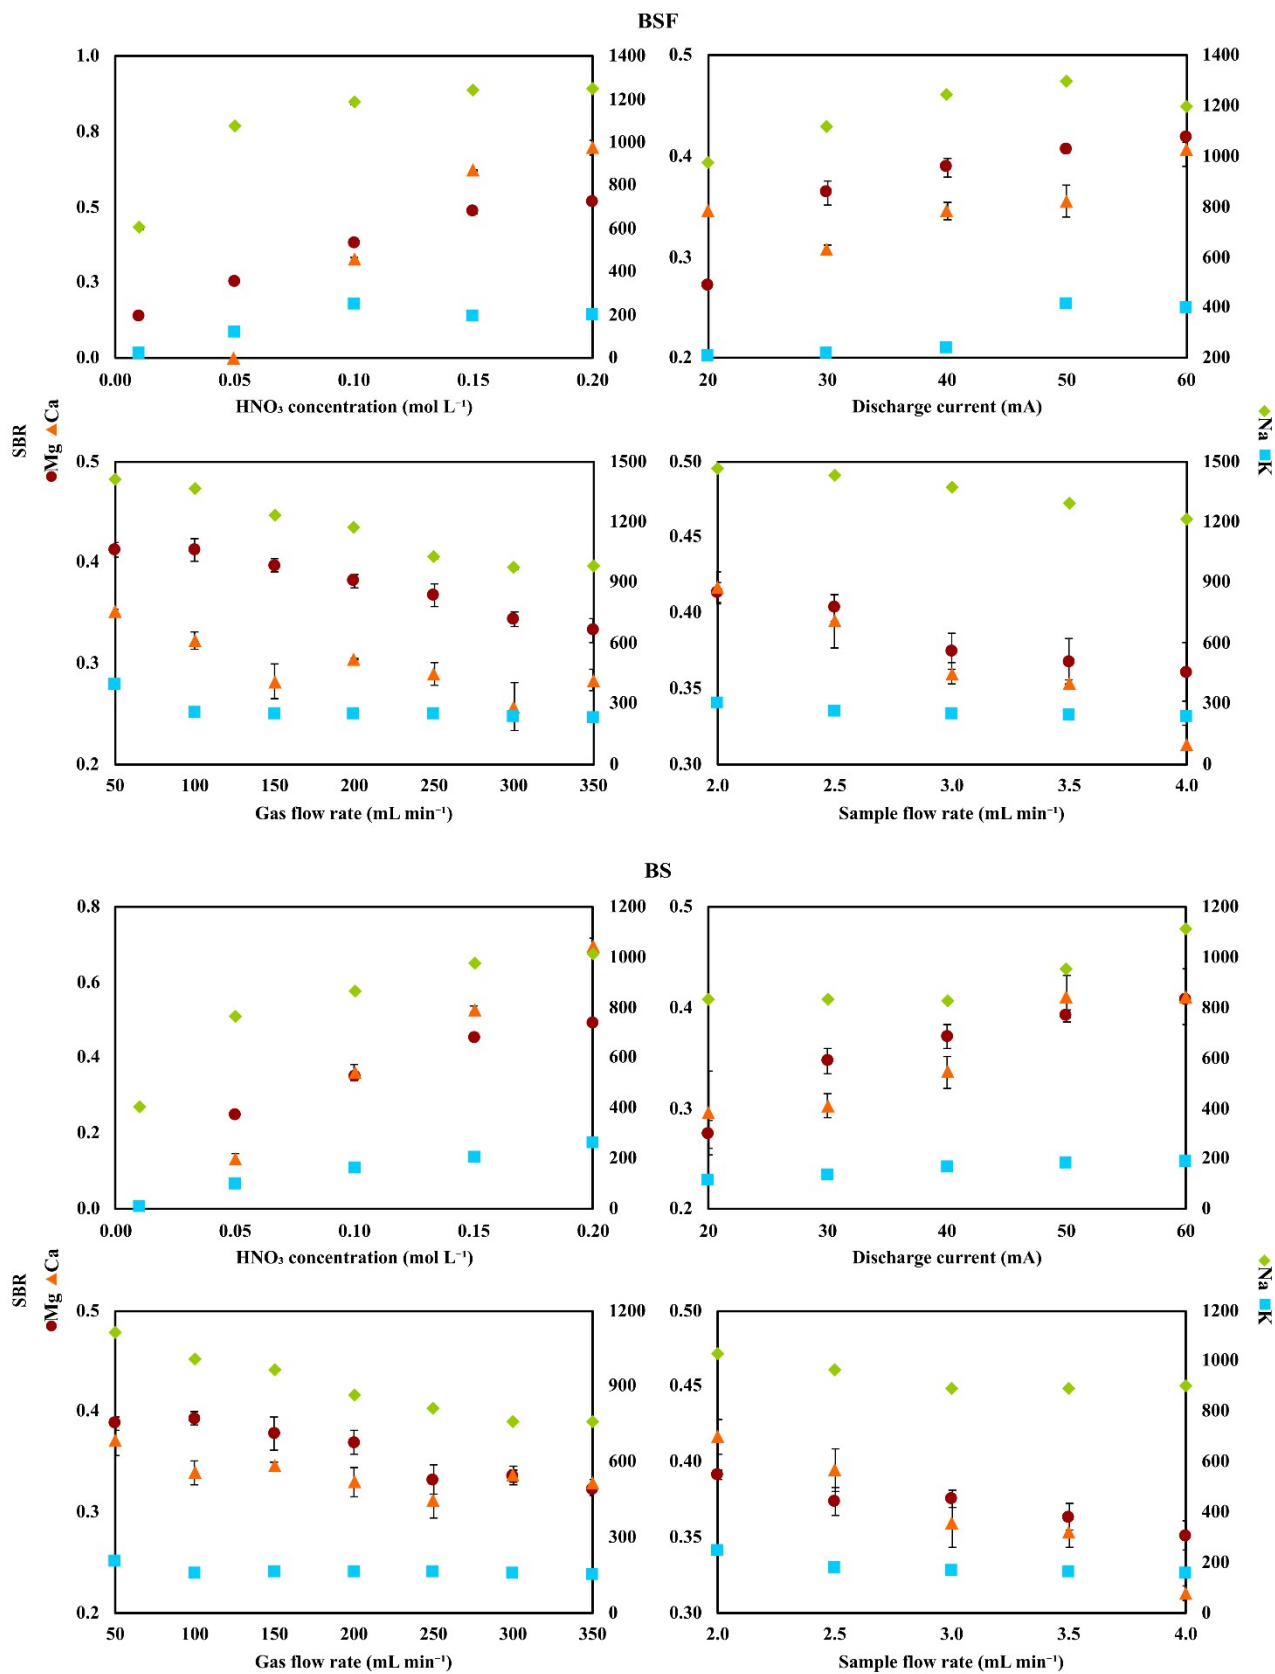

Fig. SI3. The impact of the HNO<sub>3</sub> concentration, the discharge current, the gas flow rate, and the sample flow rate on the SBR values of the analytical lines of the studied elements for the BSF and BS samples.

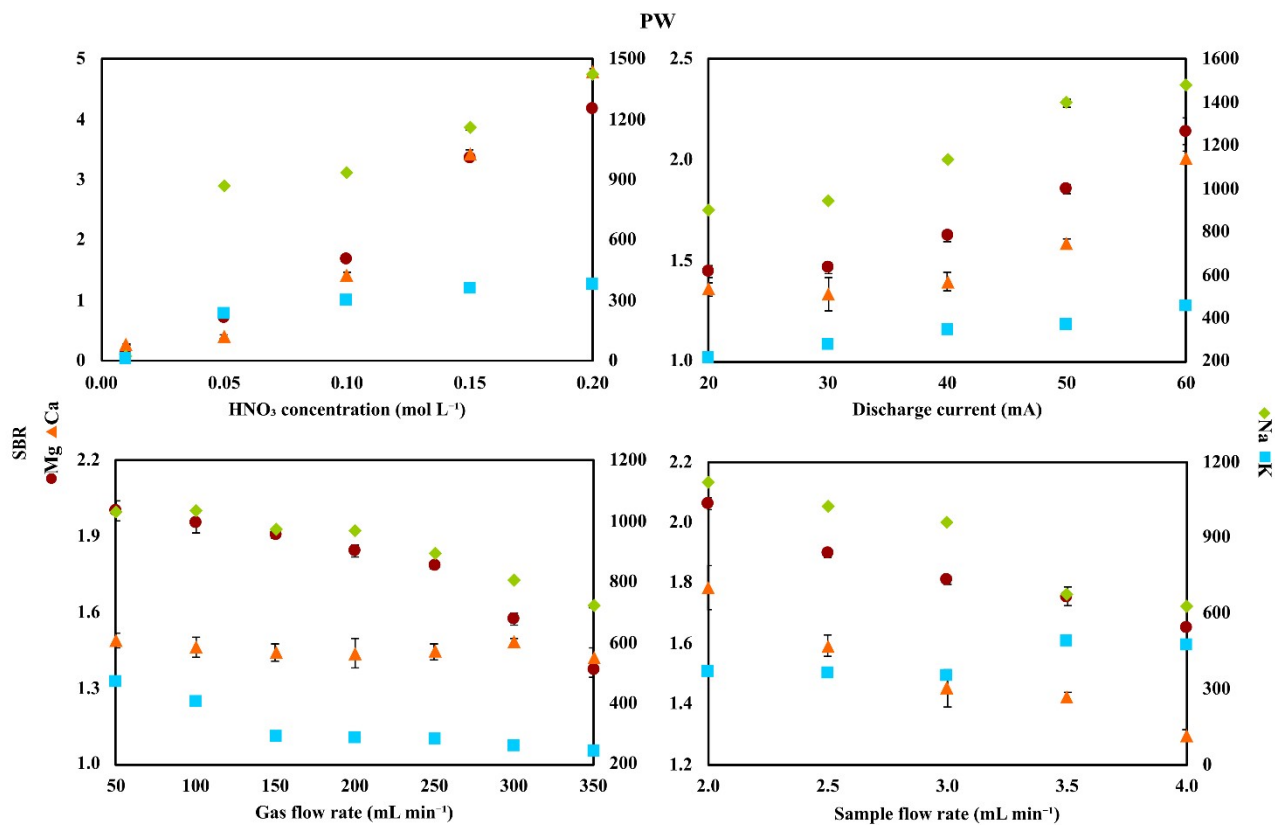

Fig. SI4. The impact of the  $\text{HNO}_3$  concentration, the discharge current, the gas flow rate, and the sample flow rate on the SBR values of the analytical lines of the studied elements for the PW sample solution.

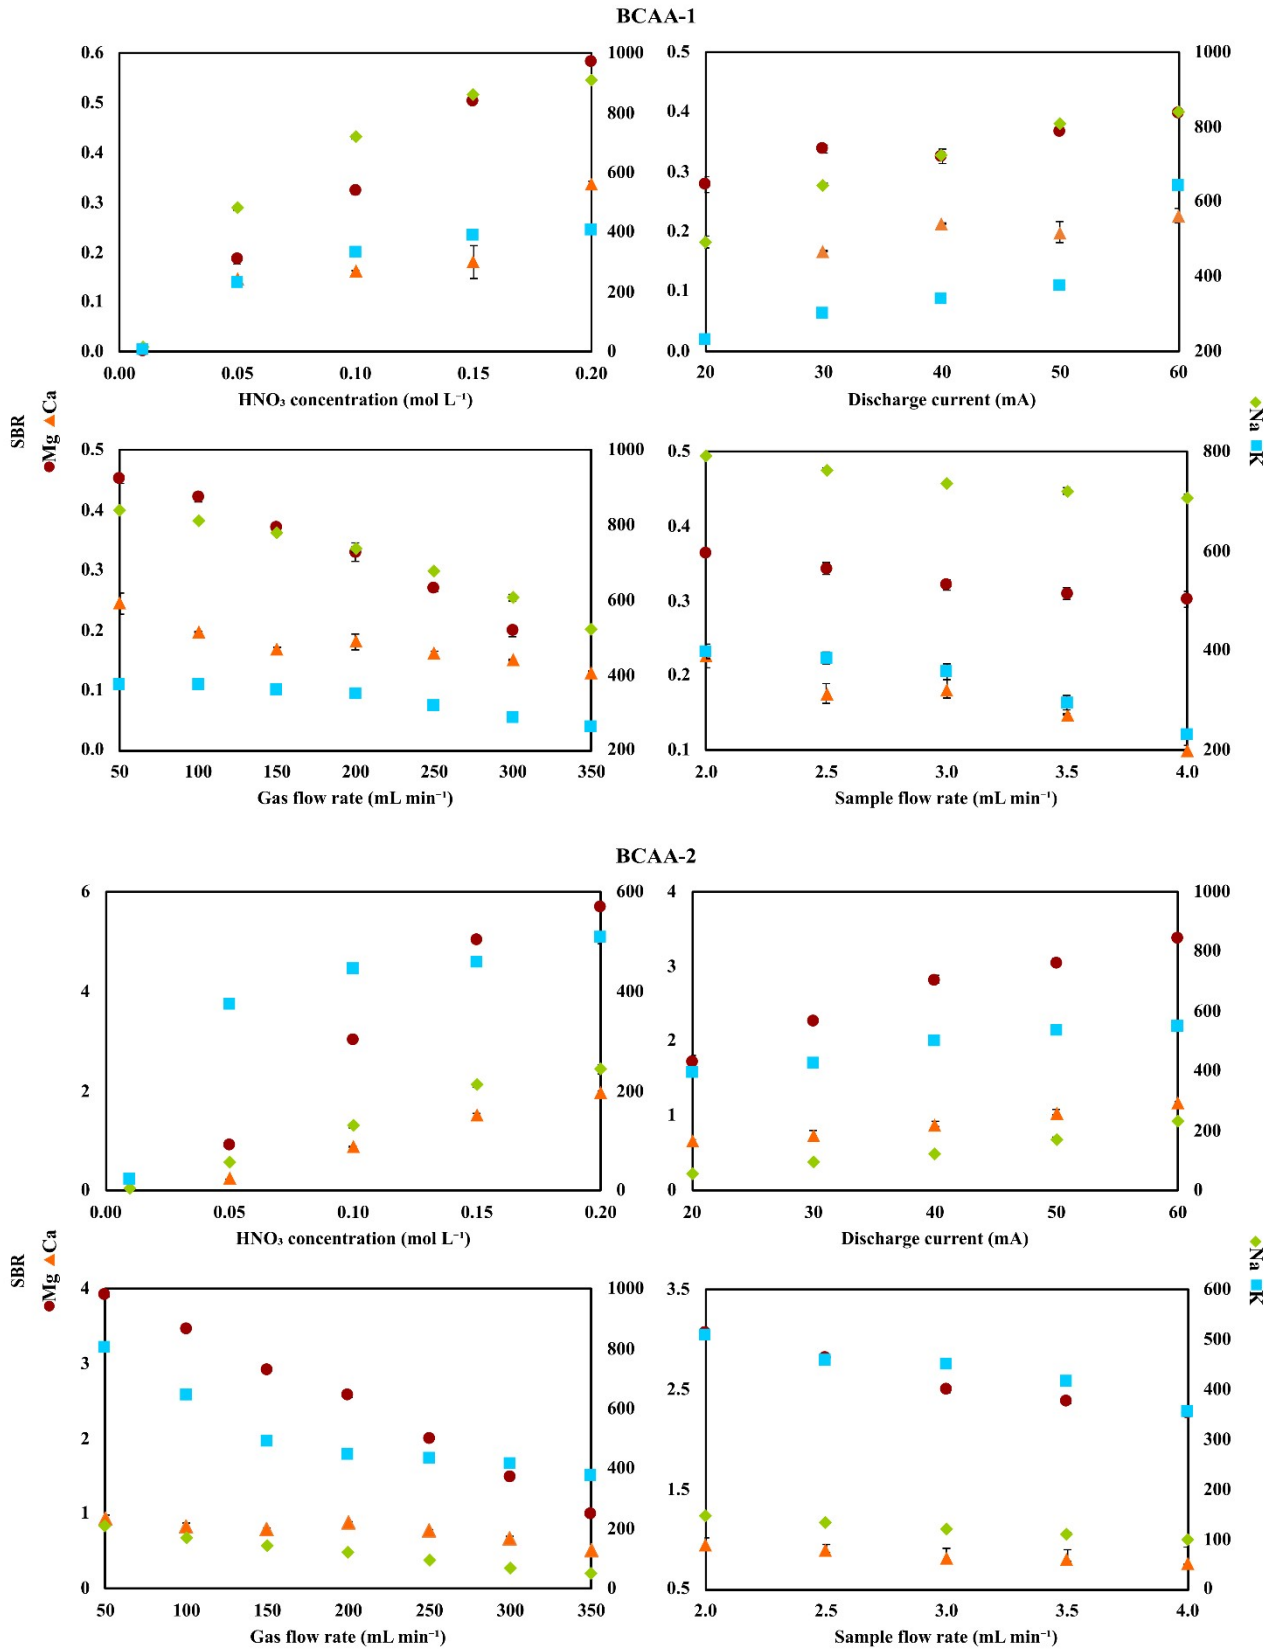

Fig. SI5. The impact of the HNO<sub>3</sub> concentration, the discharge current, the gas flow rate, and the sample flow rate on the SBR values of the analytical lines of the studied elements for the BCAA-1 and BCAA-2 samples.

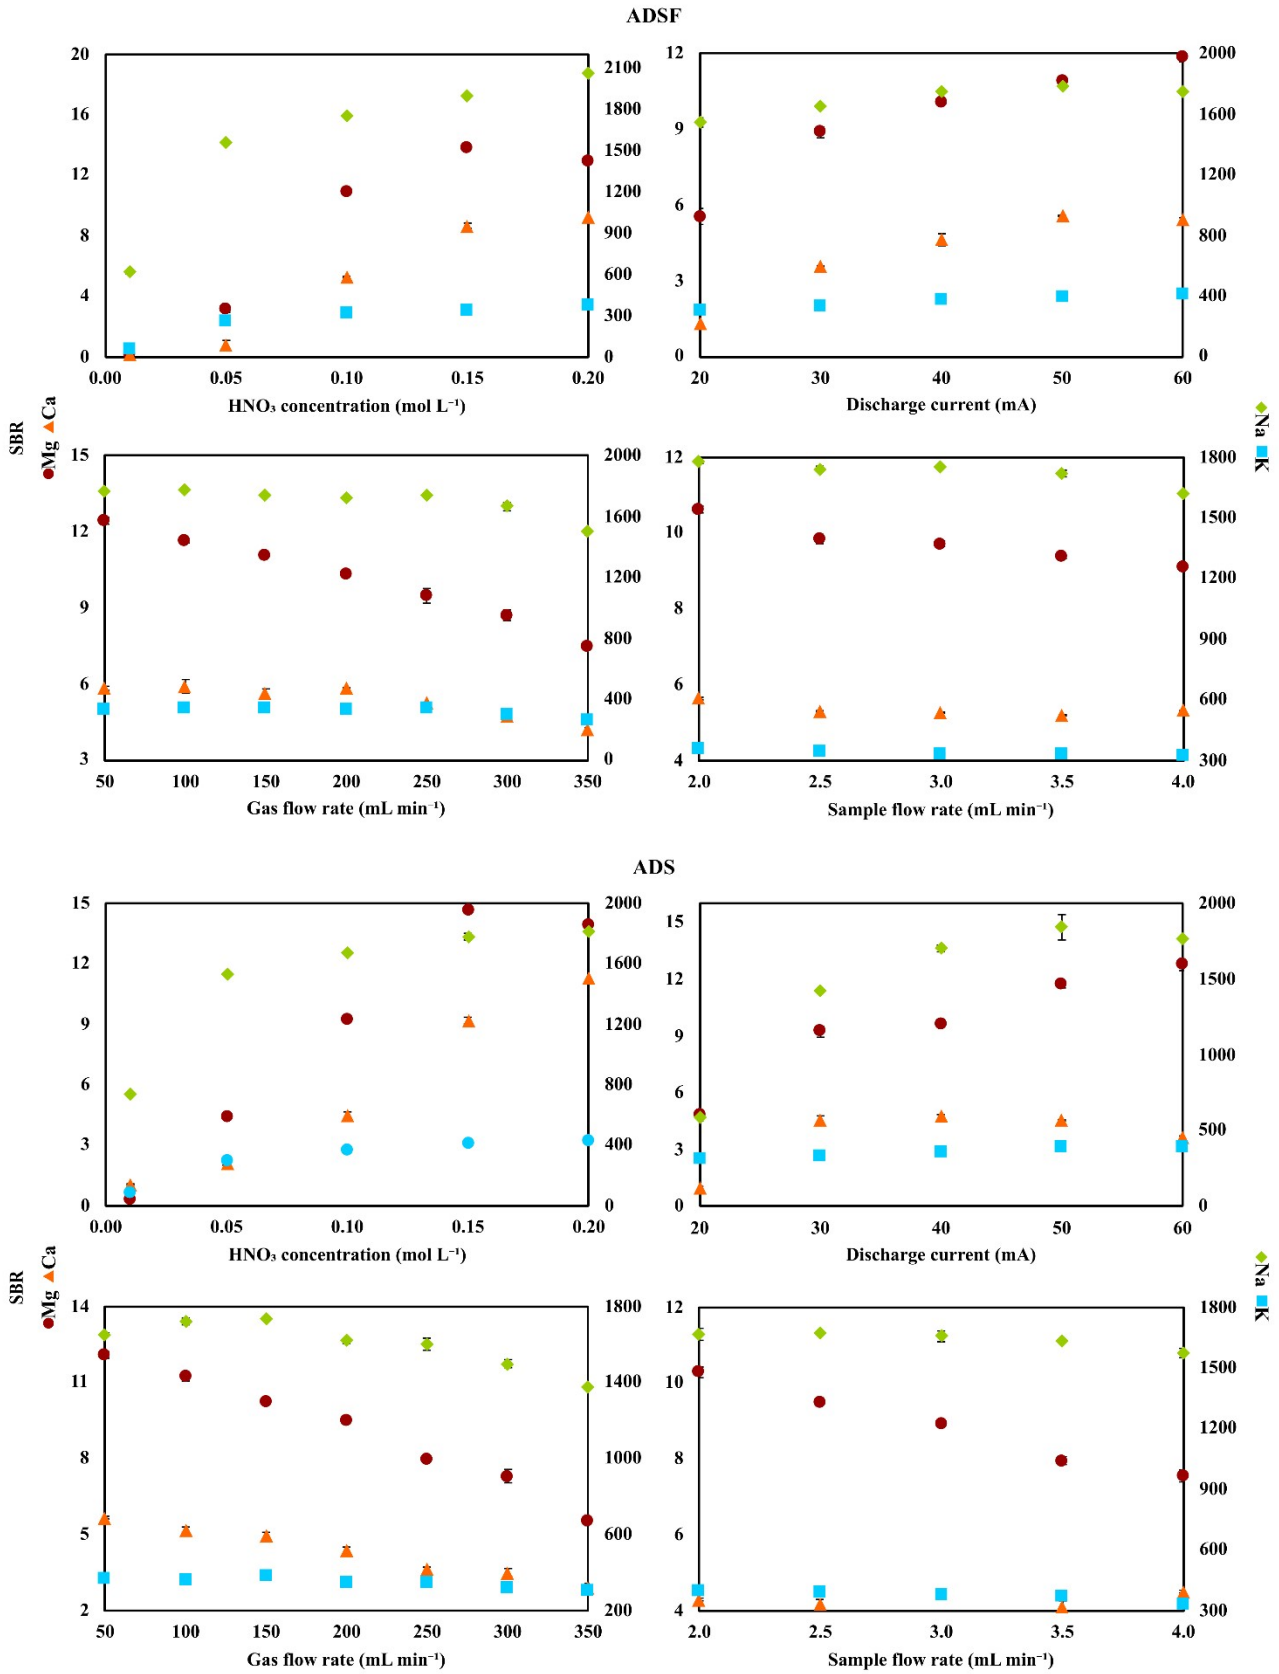

Fig. SI6. The impact of the HNO<sub>3</sub> concentration, the discharge current, the gas flow rate, and the sample flow rate on the SBR values of the analytical lines of the studied elements for the AMSF and AMS samples.



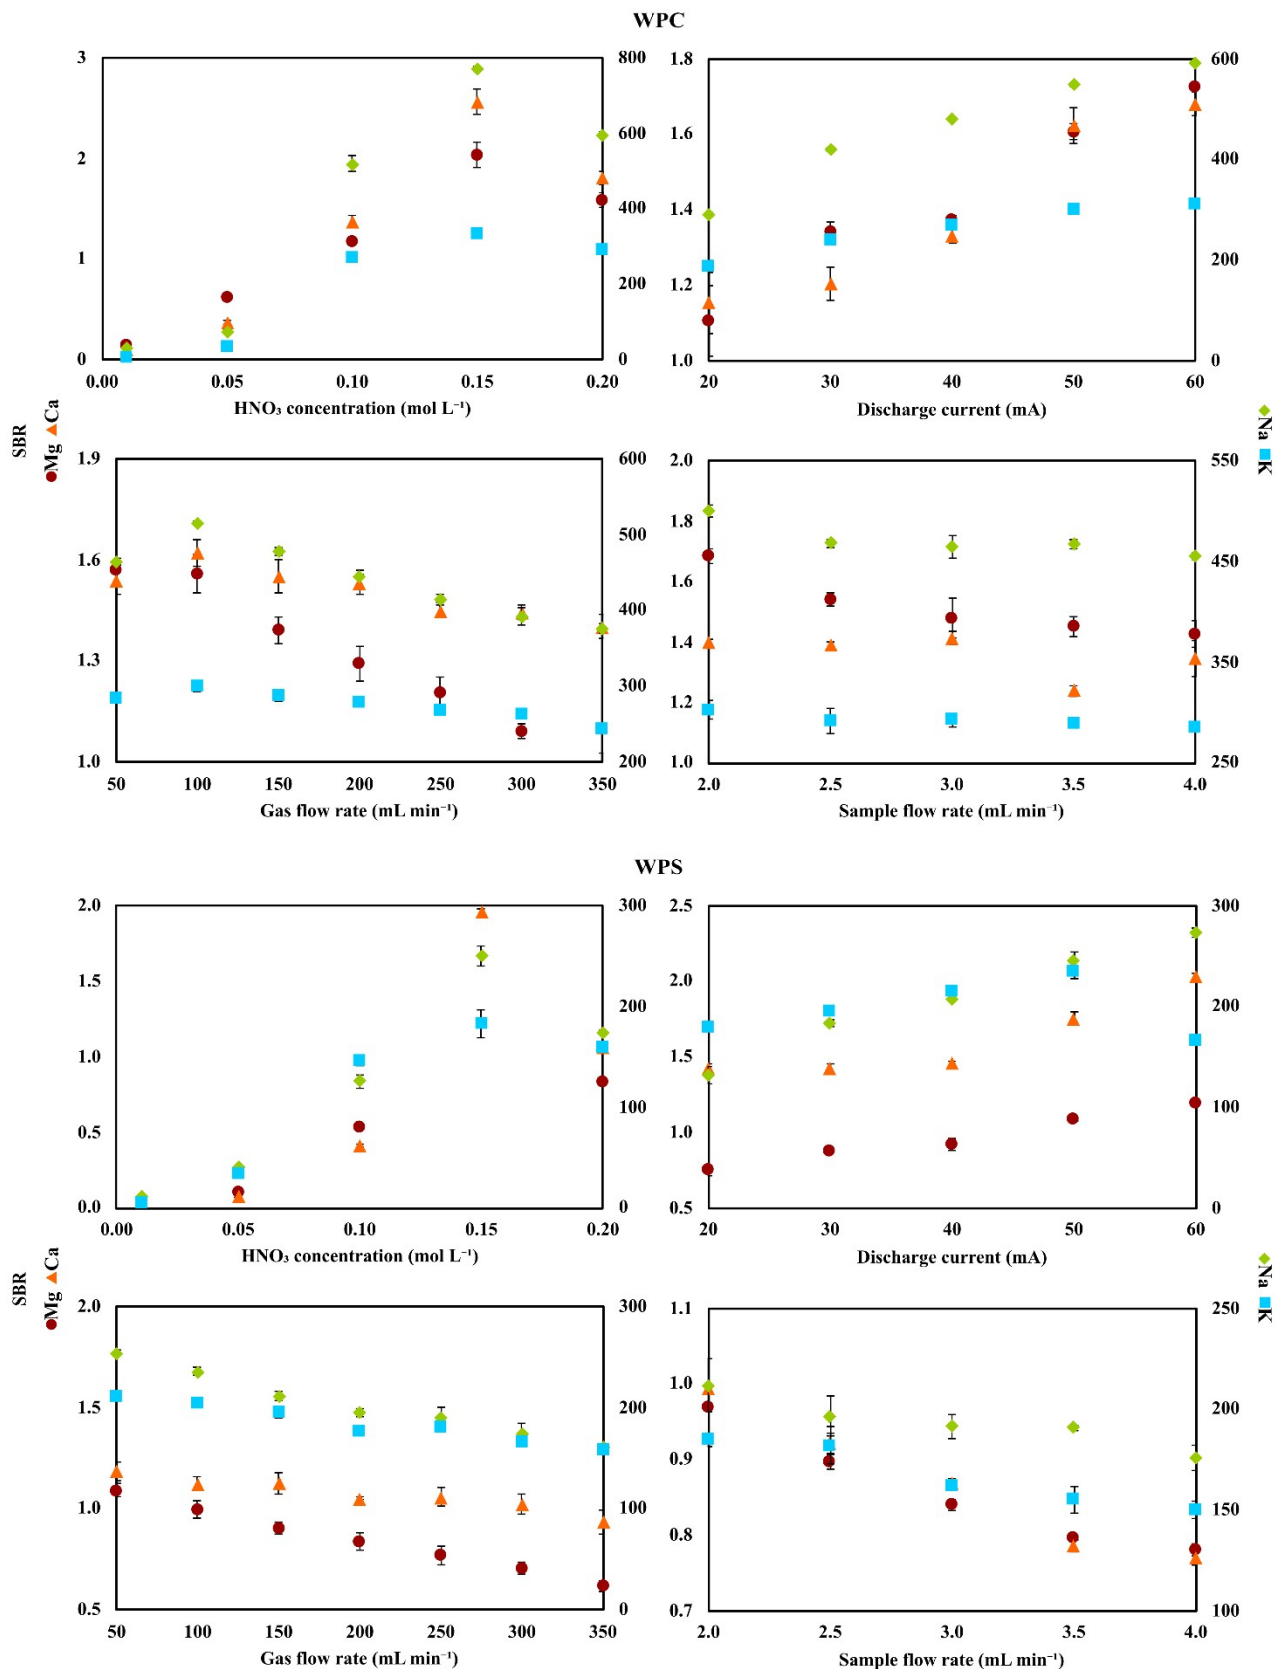

Fig. SI7. The impact of the HNO<sub>3</sub> concentration, the discharge current, the gas flow rate, and the sample flow rate on the SBR values of the analytical lines of the studied elements for the WPC and WPS samples.
